# Supplementary material for: Characterization of Mycobacterium tuberculosis isolates from Hebei, China: genotypes and drug susceptibility phenotypes
Source: PubMed Central journal article supplement (PMC4778344; doi:10.1186/s12879-016-1441-2), 2016-03-03

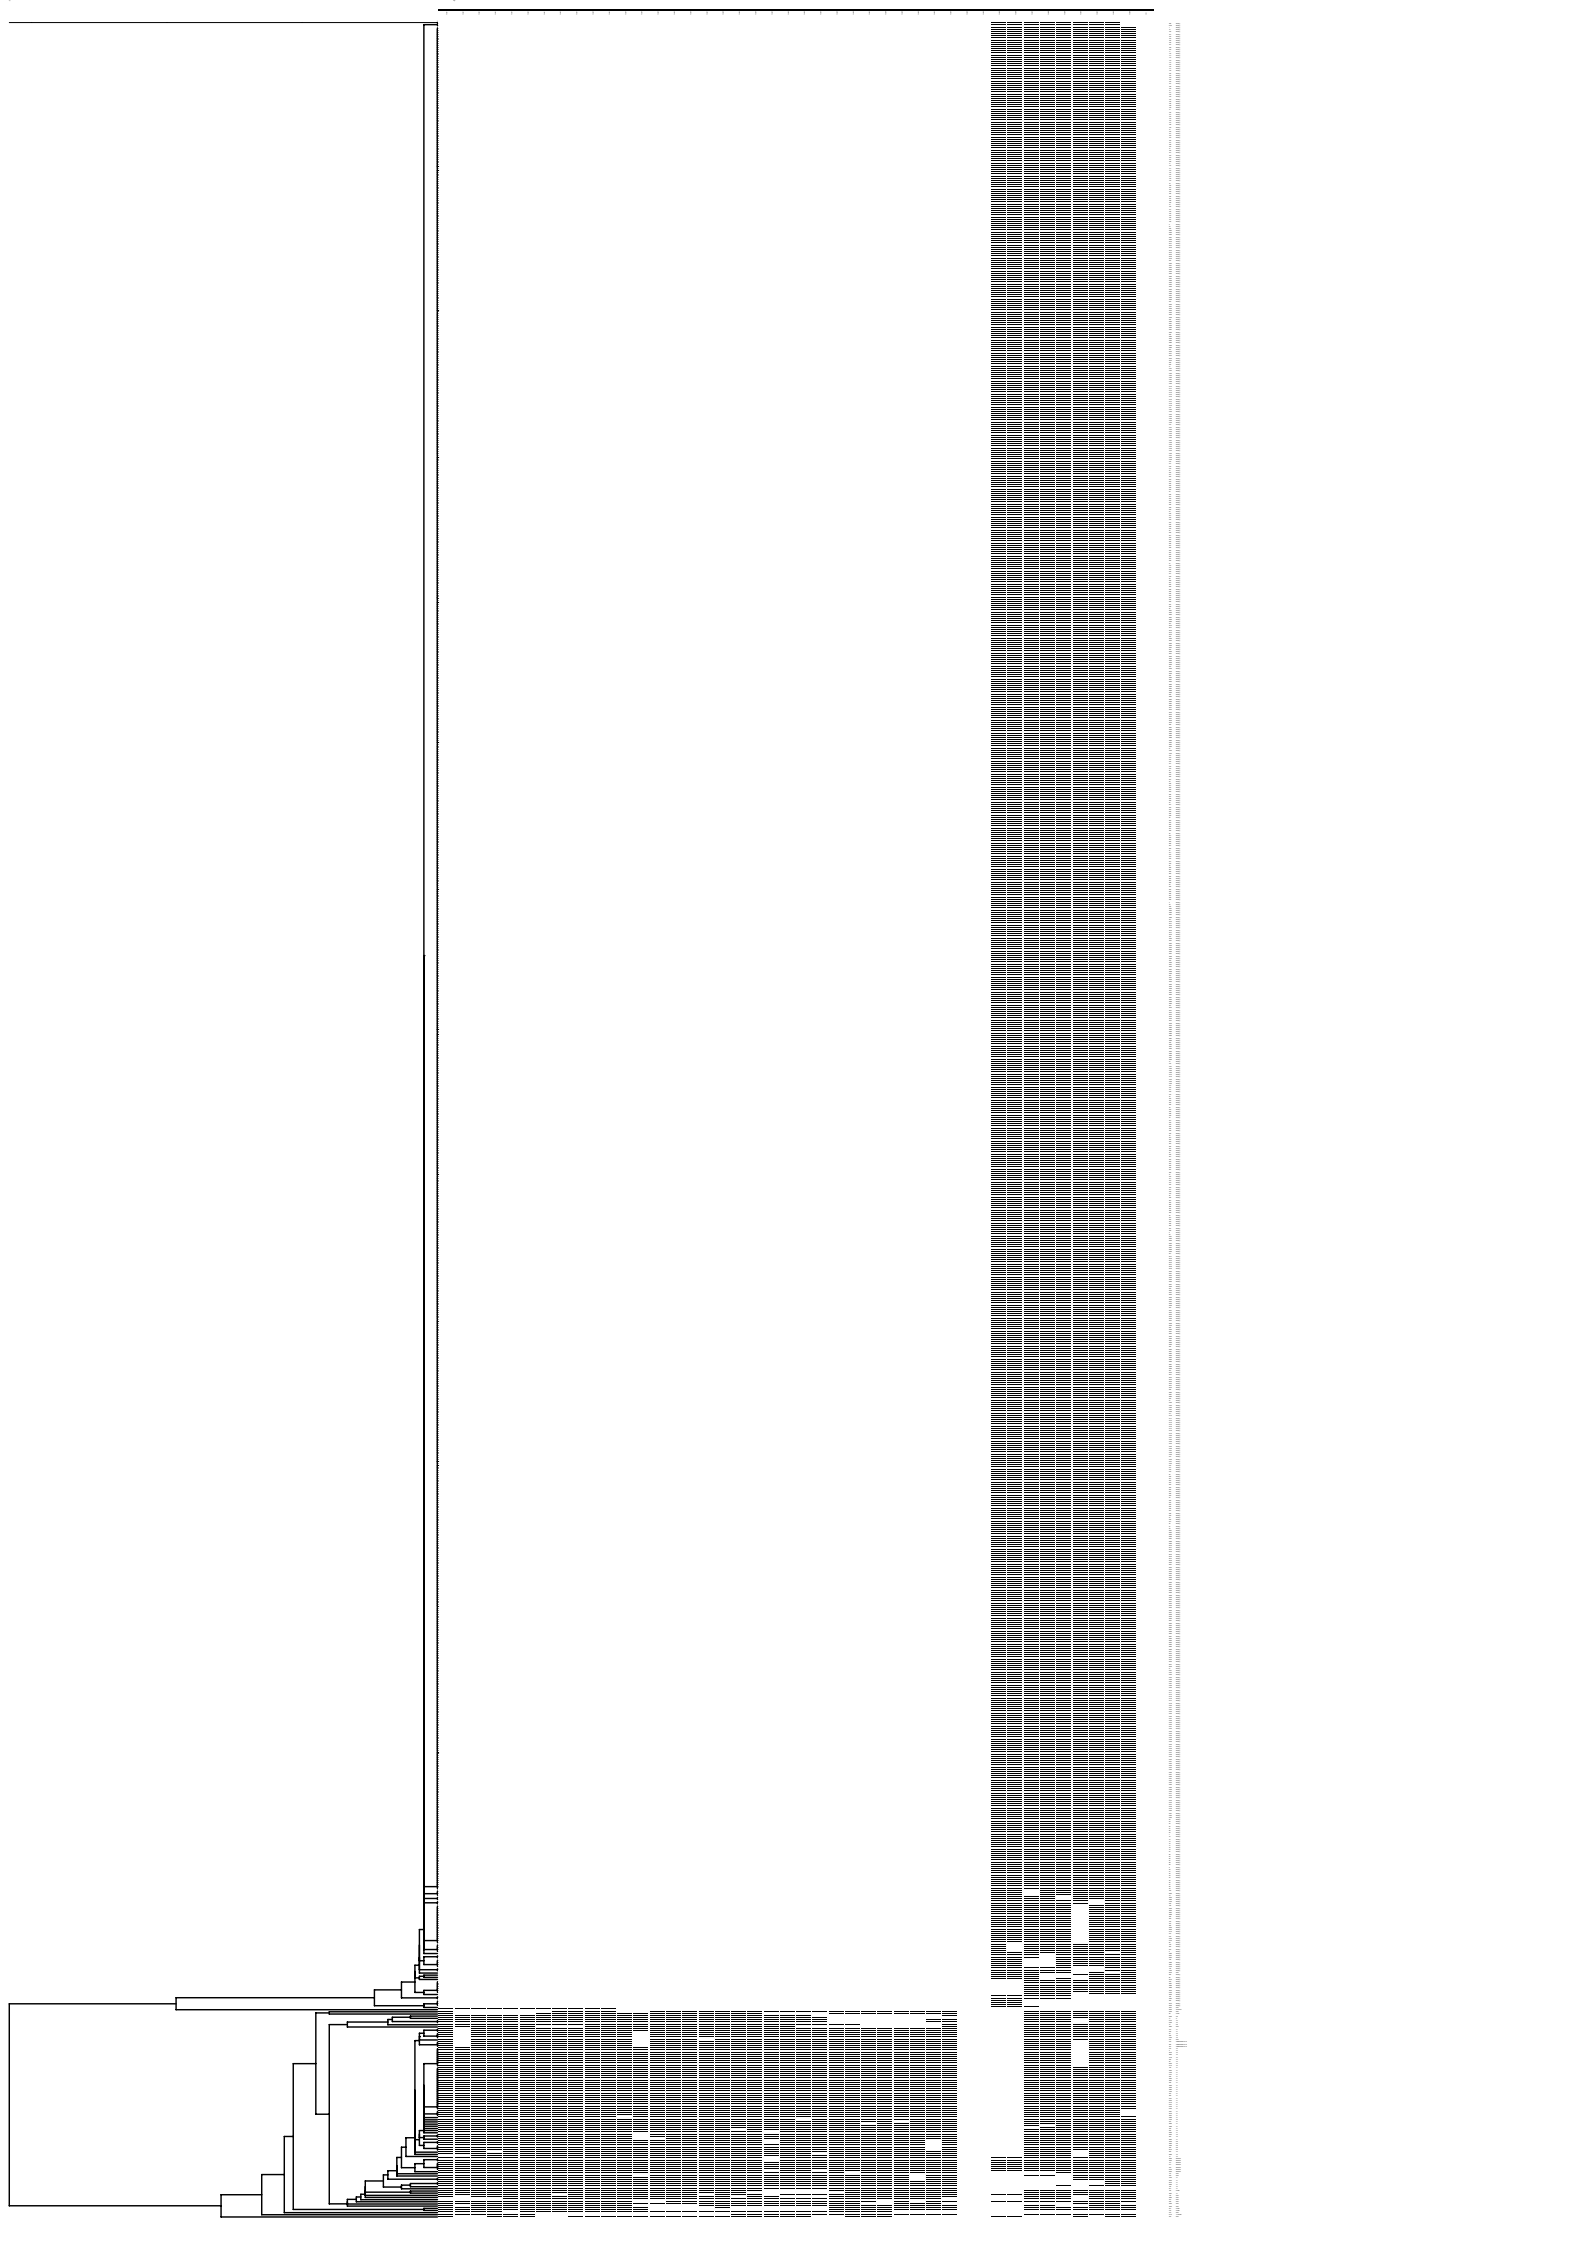

Supplement: 12879_2016_1441_MOESM3_ESM.pdf [file 12879_2016_1441_MOESM3_ESM.pdf]
